# Supplementary material for: Low-Dose Radiation Effects on the Substantia Nigra in Swine: Insights into Parkinson’s Disease Biomarkers
Source: Research Square preprint supplement (doi:10.21203/rs.3.rs-6558308/v1), 2025-05-16

### **Supplementary Figure 1.**

Scatter plots representing the densitometric ratio of levels for TH, alpha-synuclein, phospho-alpha-synuclein, GFAP, RAB12, GBA, VPS13C and Cathepsin D with respect to Total Protein as measured in the substantia nigra in the brains of Vehicle or Captopril treated groups. One-way ANOVA confirmed there was no statistical difference between protein expression in captopril or vehicle treated groups thus, Sham + captopril and Sham + vehicle samples were pooled and Radiation + captopril and Radiation + vehicle samples were pooled for overall data analysis resulting in n=8 for Sham and n=6 for Radiation.

### **Supplementary Figure 2.**

Scatter plots representing the densitometric ratio of levels for ATP5A, SDHB and NDUF8 with respect to Total Protein as measured in the substantia nigra in the brains of Vehicle or Captopril treated groups. One-way ANOVA confirmed there was no statistical difference between protein expression in captopril or vehicle treated groups thus, Sham + captopril and Sham + vehicle samples were pooled and Radiation + captopril and Radiation + vehicle samples were pooled for overall data analysis resulting in n=8 for Sham and n=6 for Radiation.

### **Supplementary Figure 3.**

Images of the full-length blots for alpha-synuclein, phospho-alpha-synuclein, tyrosine hydroxylase and GBA1 along with their associated Total Protein stains. Blots correspond to the cropped images in Figure 1.

**Supplementary Figure 4.**

Images of the full-length blots for GFAP, RAB12, VPS13C and Cathepsin D along with their associated Total Protein stains. Blots correspond to the cropped images in Figure 1.

**Supplementary Figure 5.**

Images of the full-length blots for ATP5A, SDHB and NDUF8 along with their associated Total Protein stains. Blots correspond to the cropped images in Figure 2.

## Tyrosine Hydroxylase

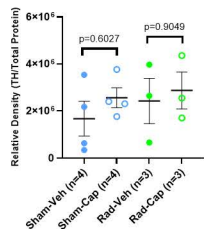

| ANOVA summary                                 |        |
|-----------------------------------------------|--------|
| F                                             | 0.5287 |
| P value                                       | 0.6726 |
| P value summary                               | ns     |
| Significant diff. among means ( $P < 0.05$ )? | No     |
| R squared                                     | 0.1369 |

## alpha-synuclein

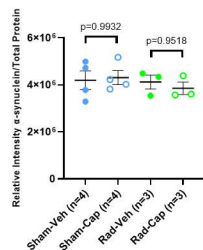

| ANOVA summary                                 |         |
|-----------------------------------------------|---------|
| F                                             | 0.3170  |
| P value                                       | 0.8129  |
| P value summary                               | ns      |
| Significant diff. among means ( $P < 0.05$ )? | No      |
| R squared                                     | 0.08684 |

## phospho-alpha-synuclein

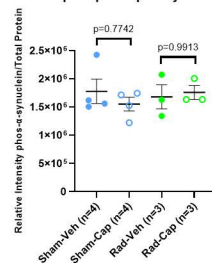

| ANOVA summary                                 |         |
|-----------------------------------------------|---------|
| F                                             | 0.3651  |
| P value                                       | 0.7796  |
| P value summary                               | ns      |
| Significant diff. among means ( $P < 0.05$ )? | No      |
| R squared                                     | 0.09872 |

## GFAP

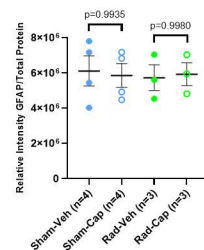

| ANOVA summary                                 |         |
|-----------------------------------------------|---------|
| F                                             | 0.04565 |
| P value                                       | 0.9863  |
| P value summary                               | ns      |
| Significant diff. among means ( $P < 0.05$ )? | No      |
| R squared                                     | 0.01351 |

## RAB12

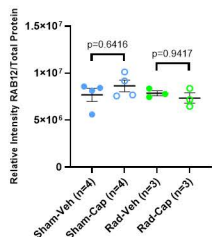

| ANOVA summary                                 |        |
|-----------------------------------------------|--------|
| F                                             | 0.8667 |
| P value                                       | 0.4899 |
| P value summary                               | ns     |
| Significant diff. among means ( $P < 0.05$ )? | No     |
| R squared                                     | 0.2064 |

## Cathepsin D

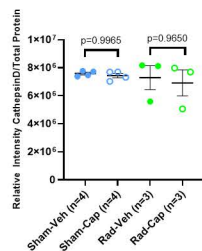

| ANOVA summary                                 |         |
|-----------------------------------------------|---------|
| F                                             | 0.2770  |
| P value                                       | 0.8408  |
| P value summary                               | ns      |
| Significant diff. among means ( $P < 0.05$ )? | No      |
| R squared                                     | 0.07671 |

## VPS13C

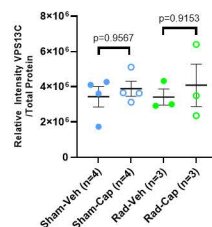

| ANOVA summary                                 |         |
|-----------------------------------------------|---------|
| F                                             | 0.2284  |
| P value                                       | 0.8746  |
| P value summary                               | ns      |
| Significant diff. among means ( $P < 0.05$ )? | No      |
| R squared                                     | 0.06412 |

## GBA

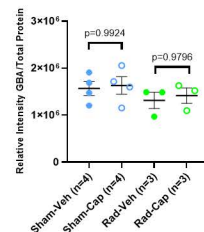

| ANOVA summary                                 |        |
|-----------------------------------------------|--------|
| F                                             | 0.6926 |
| P value                                       | 0.5772 |
| P value summary                               | ns     |
| Significant diff. among means ( $P < 0.05$ )? | No     |
| R squared                                     | 0.1720 |

### ATP5A

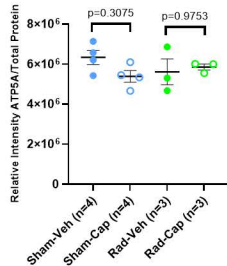

| ANOVA summary                             |        |
|-------------------------------------------|--------|
| F                                         | 1.232  |
| P value                                   | 0.3486 |
| P value summary                           | ns     |
| Significant diff. among means (P < 0.05)? | No     |
| R squared                                 | 0.2699 |

### SDHB

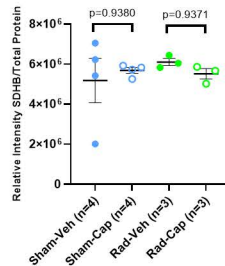

| ANOVA summary                             |         |
|-------------------------------------------|---------|
| F                                         | 0.3261  |
| P value                                   | 0.8066  |
| P value summary                           | ns      |
| Significant diff. among means (P < 0.05)? | No      |
| R squared                                 | 0.08912 |

### NDUF8

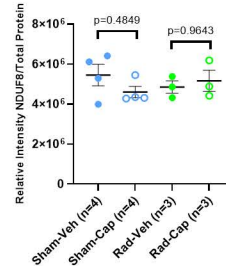

| ANOVA summary                             |        |
|-------------------------------------------|--------|
| F                                         | 0.8006 |
| P value                                   | 0.5214 |
| P value summary                           | ns     |
| Significant diff. among means (P < 0.05)? | No     |
| R squared                                 | 0.1937 |

**Alpha synuclein 1:1000**  
**14 kDa**

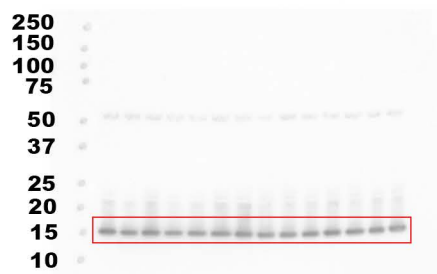

**Total Protein**  
**alpha synuclein**

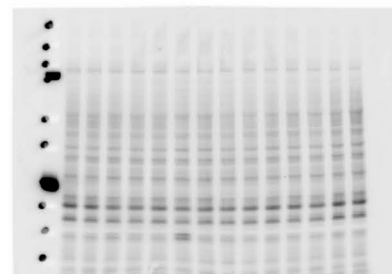

**phospho-Alpha synuclein 1:1000**  
**14kDa**

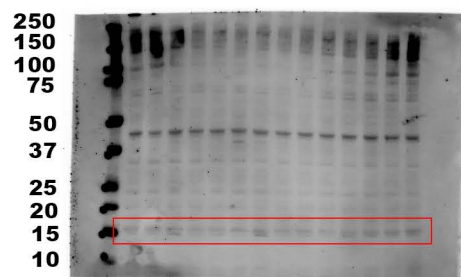

**Total Protein**  
**phospho-alpha synuclein**

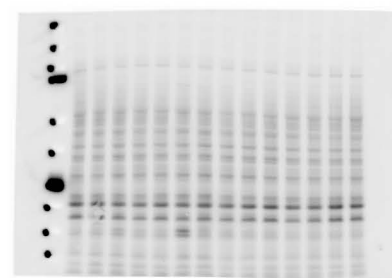

**Tyrosine Hydroxylase 1:1000**  
**60kDa**

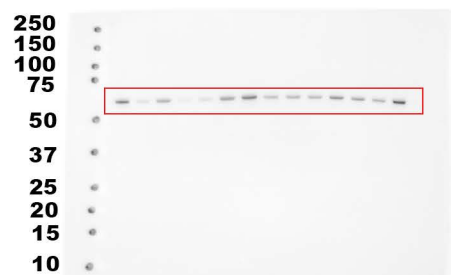

**Total Protein**  
**Tyrosine Hydroxylase**

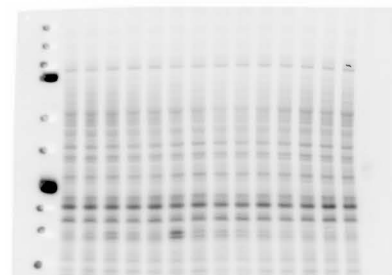

**GBA 1:500**  
**60-65 kDa**

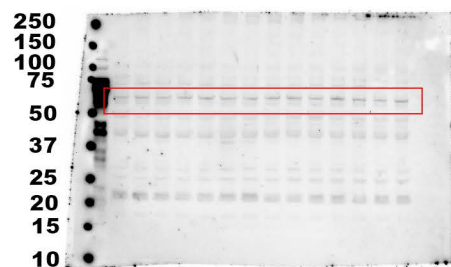

**Total Protein**  
**GBA**

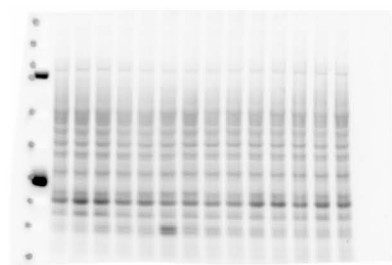

**GFAP 1:40000**  
**50kDa**

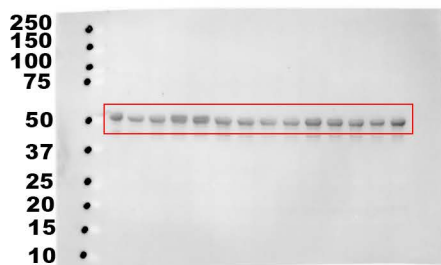

**Total Protein**  
**GFAP**

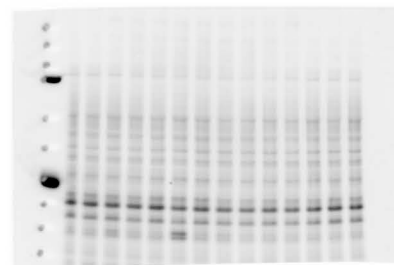

**RAB12 1:1000**  
**28kDa**

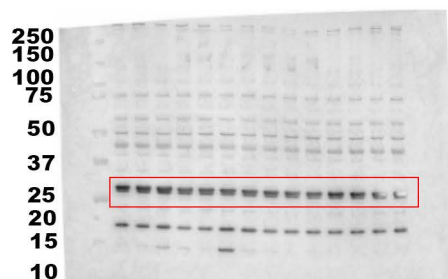

**Total Protein**  
**RAB12**

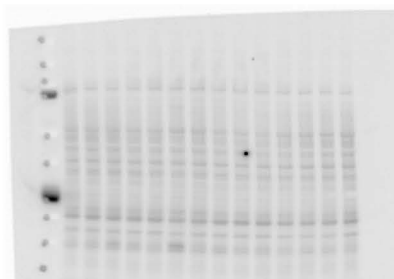

**VPS13C 1:2000**  
**422kDa**

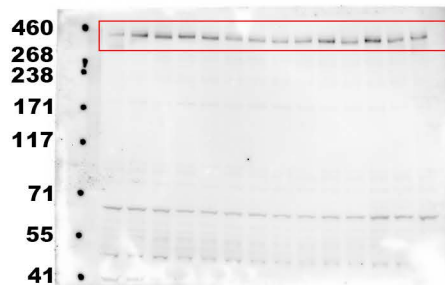

**Total Protein**  
**VPS13C**

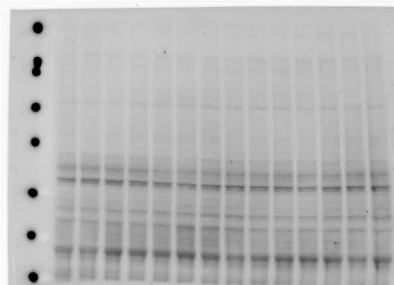

**Cathepsin D 1:2500**  
**32kDa**

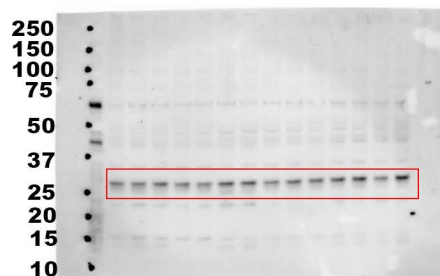

**Total Protein**  
**Cathepsin D**

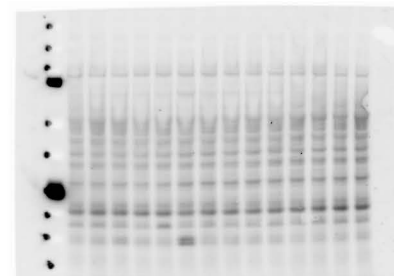

**ATP5A 1:1000**  
**60kDa**

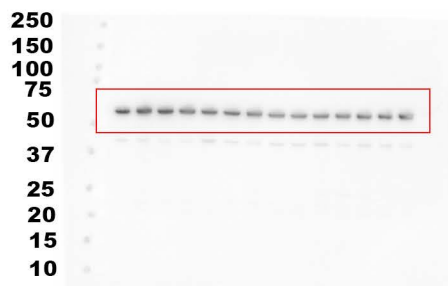

**Total Protein**  
**ATP5A**

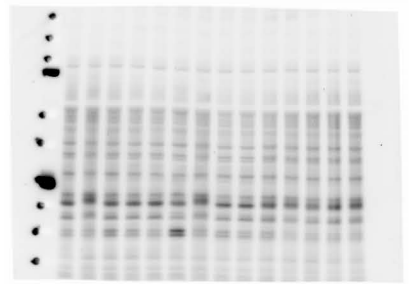

**SDHB 1:500**  
**32kDa**

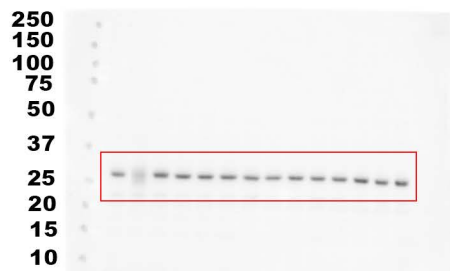

**Total Protein**  
**SDHB**

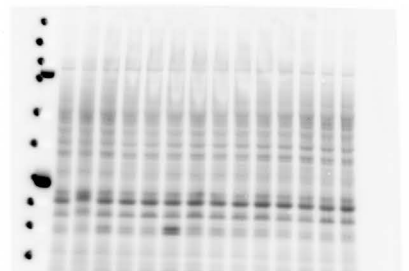

**NDUF8 1:500**  
**22kDa**

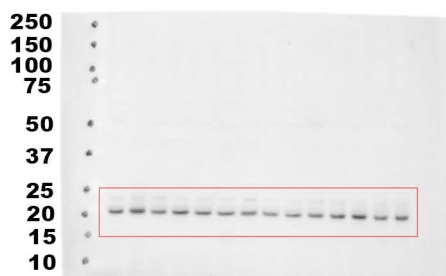

**Total Protein**  
**NDUF8**

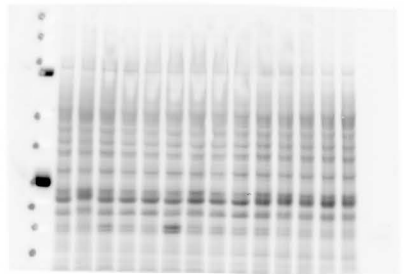

Supplement: Supplementary file 1 [file 55345cec8d6cb30aebabf4dd.pdf]
